1 **Title:** The complete mitochondrial genome of a parthenogenetic ant, *Monomorium triviale*

2 (Hymenoptera: Formicidae)

3

4 **Authors:** Naoto Idogawa<sup>1\*</sup>, Chih-Chi Lee<sup>2</sup>, Chin-Cheng Scotty Yang<sup>3</sup> and Shigeto Dobata<sup>4</sup>

5

6 **Affiliation:**

7 <sup>1</sup> Laboratory of Insect Ecology, Graduate School of Agriculture, Kyoto University, Kyoto

8 606-8502, Japan.

9 <sup>2</sup> Institute of Evolution, Department of Evolutionary and Environmental Biology, University

10 of Haifa, Haifa, 31905, Israel.

11 <sup>3</sup> Department of Entomology, Virginia Polytechnic Institute and State University, Blacksburg,

12 VA, 24061-0131, USA.

13 <sup>4</sup> Department of General Systems Studies, Graduate School of Arts and Sciences, The

14 University of Tokyo, Komaba, Meguro, Tokyo 153-8902, Japan.

15 \*Corresponding author

16 E-mail: idogawa.naoto.na@alumni.tsukuba.ac.jp

17

18 **ORCID digit of the author**

19 Naoto Idogawa: 0000-0003-4055-8204

20 Chih-Chi Lee: 0000-0002-8778-1449

21 Chin-Cheng Scotty Yang: 0000-0003-0967-5170

22 Shigeto Dobata: 0000-0003-1586-6758

23 **ABSTRACT**

24 *Monomorium* is one of the most species-rich yet taxonomically problematic ant genera.  
25 An East Asian species, *M. triviale* Wheeler, W.M., 1906, reproduces by obligate thelytokous  
26 parthenogenesis and performs strict reproductive division of labor. We sequenced the *M.*  
27 *triviale* mitogenome using next-generation sequencing methods. The circular mitogenome of  
28 *M. triviale* was 16,290 bp in length, consisting of 13 protein-coding genes, two ribosomal  
29 RNA genes, 22 transfer RNAs, and a single non-coding region of 568 bp. The base  
30 composition was AT-biased (82%). Gene order rearrangements were detected and likely to be  
31 unique to genus *Monomorium*. We announce the *M. triviale* mitogenome as additional  
32 genomic resources for phylogenetic characterization of *Monomorium* and comparative  
33 genomics of parthenogenetic ant species.

34

35 **KEYWORDS:** clonal ant, Hymenoptera, Formicidae, thelytoky

36

37 In the hyperdiverse ant subfamily Myrmicinae, *Monomorium* Mayr, 1855 is among one of  
38 the most species-rich genera with over 300 described species including several successful  
39 tramp species such as the flower ant, *M. floricola*, *M. salomonis*, and the pharaoh ant, *M.*  
40 *pharaonis* (Pontieri & Linksvayer, 2019). However, recent studies (Ward 2015, Sparks 2019)  
41 suggest polyphyly of this genus, and genomic resources are therefore essential for resolving  
42 such a taxonomic issue.

43 An East Asian species, *M. triviale* Wheeler, W.M., 1906 is particularly of our interest as it  
44 reproduces by thelytokous parthenogenesis where virgin queens produce both workers and  
45 next-generation queens (Gotoh et al., 2012; Idogawa et al., bioRxiv). To date, only partial  
46 mitochondrial DNA sequences have been reported, with all of which being identical among  
47 populations in Japan (Idogawa et al., bioRxiv). Hence, a complete mitochondrial genome of  
48 this species can provide additional information for further analysis. Here, we present the first  
49 complete mitogenome for *M. triviale*.

50 A colony of *M. triviale* headed by a single queen was collected in Takaragaike Park,  
51 Kyoto, Japan (35.060087 N, 135.788488 E) on Sept. 9, 2017. The queen and her  
52 parthenogenetic offspring produced later in the laboratory (larvae and pupae, approx. 100  
53 individuals) were fixed in 99.5% EtOH. We extracted genomic DNA from the pooled  
54 individuals with DNeasy Blood and Tissue kit (Qiagen, Hilden, Germany). We sequenced the  
55 pooled DNA on the HiSeq X sequencer (Illumina, San Diego, CA) at MacroGen Japan Corp.,  
56 Tokyo. After removing adapters with Trimmomatic v0.39 (Bolger et al. 2014), we conducted  
57 de novo mitogenome assembly based on 4,327,159 paired-end sequence reads using  
58 NOVOPlasty v3.6 (Dierckxsens et al. 2017), with *Solenopsis invicta* mitogenome (NCBI  
59 accession: NC\_014672) as a seed. Average read coverage of the mitogenome assembly was  
60 37,840, providing ample depth for correctness. We annotated protein coding genes (PCGs),

61 rRNAs and tRNAs using GeSeq (Tillich et al. 2017), MITOS (Bernt et al. 2013), NCBI  
62 ORF-finder (Rombel et al. 2002), and ARWEN (Laslett and Canbäck 2008). The sequence  
63 information was deposited in the DNA Data Bank of Japan under accession number:  
64 LC605004. A specimen was deposited at the Laboratory of Insect Ecology, Graduate School  
65 of Agriculture, Kyoto University (<http://www.insecteco.kais.kyoto-u.ac.jp>; N. Idogawa; under  
66 the voucher number Mtri\_20170909\_4).

67 The complete mitogenome of *M. triviale* was 16,920 bp, which is comparable to other ant  
68 species. The nucleotide composition was AT-biased (82%). The mitogenome contained 13  
69 PCGs, two rRNAs, and 22 tRNAs, and were typical for most animals. All PCGs used ATG or  
70 ATT as the start codon and TAA or TAG as the stop codon. The tRNAs, ranging in size from  
71 59 to 74 bp, were similar to other ants (54–90 bp). The control region presumably  
72 corresponded to the single largest non-coding AT-rich region (569 bp, A+T 94%). Gene order  
73 of *M. triviale* was identical to that of a congener, *M. pharaonis* (NC\_051486.1). Notably, the  
74 gene order of the two *Monomorium* species had two rearrangements: an inversion between  
75 *trnP* and *ND1* (Myrmicinae, *ND6-CYTB-trnS*; *Monomorium*, *trnS-CYTB-ND6*; underlines  
76 indicate inverted genes) and translocations between *ND3* and *trnF* (Myrmicinae common,  
77 *trnA-trnR-trnN-trnS-trnE*; *Monomorium*, *trnR-trnE-trnA-trnN-trnS*). This feature was  
78 different from the common gene order of the subfamily Myrmicinae and likely unique to  
79 *Monomorium* ants (Babbucci et al. 2014; Park 2020). This may help identify genus  
80 *Monomorium sensu stricto*, in addition to nucleotide substitutions.

81 We inferred the phylogenetic relationship of 25 ant species using the concatenated  
82 nucleotide sequences of all 13 PCGs, with the honeybee *Apis mellifera* as an outgroup.  
83 Alignment was performed using ClustalW (Thompson et al. 2003) implemented in MEGA-X  
84 (Kumar et al. 2018). The GTR + I + G model was determined by ModelTest-NG v0.1.6

85 (Darriba et al. 2020). Both maximum likelihood (with RAxML-NG v1.0.0 (Kozlov et al.  
86 2019)) and Bayesian (with MrBayes v3.2.7 (Ronquist et al. 2012)) inferences were consistent  
87 in supporting the current phylogenetic placement of *Monomorium* in the subfamily  
88 Myrmicinae (Figure 1).

89 In conclusion, the newly sequenced complete mitochondrial genome of *M. triviale*  
90 provides additional resources for further phylogenetic characterization of the taxonomically  
91 problematic genus *Monomorium* and comparative genomics of parthenogenetic ant species.  
92

93 **Figure 1.**

94 Maximum likelihood (1,000 bootstrap repeats) and Bayesian inference (100,000  
95 generations) phylogenetic trees of 25 ant species: *Monomorium triviale* (LC605004: this  
96 study), *Anoplolepis gracilipes* (NC\_039576), *Aphaenogaster famelica* (NC\_049859), *Atta*  
97 *laevigata* (KC346251), *Atta texana* (MF417380), *Camponotus atrox* (NC\_029357),  
98 *Cardiocondyla obscurior* (KX951753), *Crematogaster teranishii* (MK940828), *Cryptopone*  
99 *sauteri* (NC\_041202), *Dolichoderus sibiricus* (NC\_041075), *Ectomomyrmex javanus*  
100 (NC\_042678), *Linepithema humile* (NC\_045057), *Monomorium pharaonis* (NC\_051486),  
101 *Myrmica scabrinodis* (NC\_026133), *Nylanderia flavipes* (NC\_049861), *Ooceraea biroi*  
102 (CM010870), *Polyrhachis dives* (NC\_030790), *Pristomyrmex punctatus* (NC\_015075),  
103 *Pseudomyrmex gracilis* (BK010472), *Solenopsis geminata* (NC\_014669), *Solenopsis invicta*  
104 (NC\_014672), *Solenopsis richteri* (NC\_014677), *Tetraoponera rufonigra* (BK010387),  
105 *Vollenhovia emeryi* (NC\_030176), *Wasmannia auropunctata* (NC\_030541) and honeybee,  
106 *Apis mellifera* (NC\_001566, as an outgroup). The numbers above branches indicate bootstrap  
107 support values for maximum likelihood tree and posterior probability for Bayesian inference  
108 tree, respectively.  
109

## 110 REFERENCES

- 111 1. Babbucci M, Basso A, Scupola A, et al (2014) Is it an ant or a butterfly? Convergent  
112 evolution in the mitochondrial gene order of Hymenoptera and Lepidoptera. *Genome*  
113 *Biol Evol* 6:3326–3343. <https://doi.org/10.1093/gbe/evu265>
- 114 2. Bernt M, Donath A, Jühling F, et al (2013) MITOS: Improved de novo metazoan  
115 mitochondrial genome annotation. *Mol Phylogenet Evol* 69:313–319.  
116 <https://doi.org/10.1016/j.ympev.2012.08.023>
- 117 3. Bolger AM, Lohse M, Usadel B (2014) Trimmomatic: A flexible trimmer for Illumina  
118 sequence data. *Bioinformatics* 30:2114–2120.  
119 <https://doi.org/10.1093/bioinformatics/btu170>
- 120 4. Darriba Di, Posada D, Kozlov AM, et al (2020) ModelTest-NG: A New and Scalable  
121 Tool for the Selection of DNA and Protein Evolutionary Models. *Mol Biol Evol*  
122 37:291–294. <https://doi.org/10.1093/molbev/msz189>
- 123 5. Dierckxsens N, Mardulyn P, Smits G (2017) NOVOPlasty: De novo assembly of  
124 organelle genomes from whole genome data. *Nucleic Acids Res* 45:  
125 <https://doi.org/10.1093/nar/gkw955>
- 126 6. Gotoh A, Billen J, Tsuji K, et al (2012) Histological study of the spermatheca in three  
127 thelytokous parthenogenetic ant species, *Pristomyrmex punctatus*, *Pyramica*  
128 *membranifera* and *Monomorium triviale* (Hymenoptera: Formicidae). *Acta Zool*  
129 93:200–207. <https://doi.org/10.1111/j.1463-6395.2010.00498.x>
- 130 7. Idogawa N, Sasaki T, Tsuji K, Dobata S (2021) Comprehensive analysis of male-free  
131 reproduction in *Monomorium triviale*; (Formicidae: Myrmicinae). *bioRxiv*  
132 2021.01.26.428225. <https://doi.org/10.1101/2021.01.26.428225>
- 133 8. Kozlov AM, Darriba D, Flouri T, et al (2019) RAxML-NG: A fast, scalable and

- 134 user-friendly tool for maximum likelihood phylogenetic inference. *Bioinformatics*  
135 35:4453–4455. <https://doi.org/10.1093/bioinformatics/btz305>
- 136 9. Kumar S, Stecher G, Li M, et al (2018) MEGA X: Molecular evolutionary genetics  
137 analysis across computing platforms. *Mol Biol Evol* 35:1547–1549.  
138 <https://doi.org/10.1093/molbev/msy096>
- 139 10. Laslett D, Canbäck B (2008) ARWEN: A program to detect tRNA genes in metazoan  
140 mitochondrial nucleotide sequences. *Bioinformatics* 24:172–175.  
141 <https://doi.org/10.1093/bioinformatics/btm573>
- 142 11. Park J, Xi H, Park J (2020) The complete mitochondrial genome of *Aphaenogaster*  
143 *famelica* (Smith, 1874) (Hymenoptera: Formicidae). *Mitochondrial DNA Part B*  
144 5:492–494. <https://doi.org/10.1080/23802359.2019.1698992>
- 145 12. Pontieri L, Linksvayer TA (2019) *Monomorium*. In: *Encyclopedia of Social Insects*.  
146 Springer International Publishing, Cham, pp 1–6
- 147 13. Rombel IT, Sykes KF, Rayner S, Johnston SA (2002) ORF-FINDER: A vector for  
148 high-throughput gene identification. *Gene* 282:33–41.  
149 [https://doi.org/10.1016/S0378-1119\(01\)00819-8](https://doi.org/10.1016/S0378-1119(01)00819-8)
- 150 14. Ronquist F, Teslenko M, Van Der Mark P, et al (2012) MrBayes 3.2: Efficient bayesian  
151 phylogenetic inference and model choice across a large model space. *Syst Biol*  
152 61:539–542. <https://doi.org/10.1093/sysbio/sys029>
- 153 15. Sparks KS, Andersen AN, Austin AD (2019) A multi-gene phylogeny of Australian  
154 *Monomorium* Mayr (Hymenoptera: Formicidae) results in reinterpretation of the genus  
155 and resurrection of *Chelaner* Emery. *Invertebr Syst* 33:225–236.  
156 <https://doi.org/10.1071/IS16080>
- 157 16. Thompson JD, Gibson TJ, Higgins DG (2003) Multiple Sequence Alignment Using



- 158            ClustalW and ClustalX. *Curr Protoc Bioinforma* 00:  
159            <https://doi.org/10.1002/0471250953.bi0203s00>
- 160        17. Tillich M, Lehwark P, Pellizzer T, et al (2017) GeSeq - Versatile and accurate  
161            annotation of organelle genomes. *Nucleic Acids Res* 45: W6–W11.  
162            <https://doi.org/10.1093/nar/gkx391>
- 163        18. Ward PS, Brady SG, Fisher BL, Schultz TR (2015) The evolution of myrmicine ants:  
164            Phylogeny and biogeography of a hyperdiverse ant clade (Hymenoptera: Formicidae).  
165            *Syst Entomol* 40:61–81. <https://doi.org/10.1111/syen.12090>  
166

167 **Acknowledgments**

168 We are grateful to Kenji Matsuura who allowed us to use his laboratory.

169 **Funding**

170 This work was supported by a Japan Society for the Promotion of Science (JSPS)

171 Research Fellowship for Young Scientists to NI (19J22242) and a grant from the Secom

172 Science and Technology Foundation to SD.

173

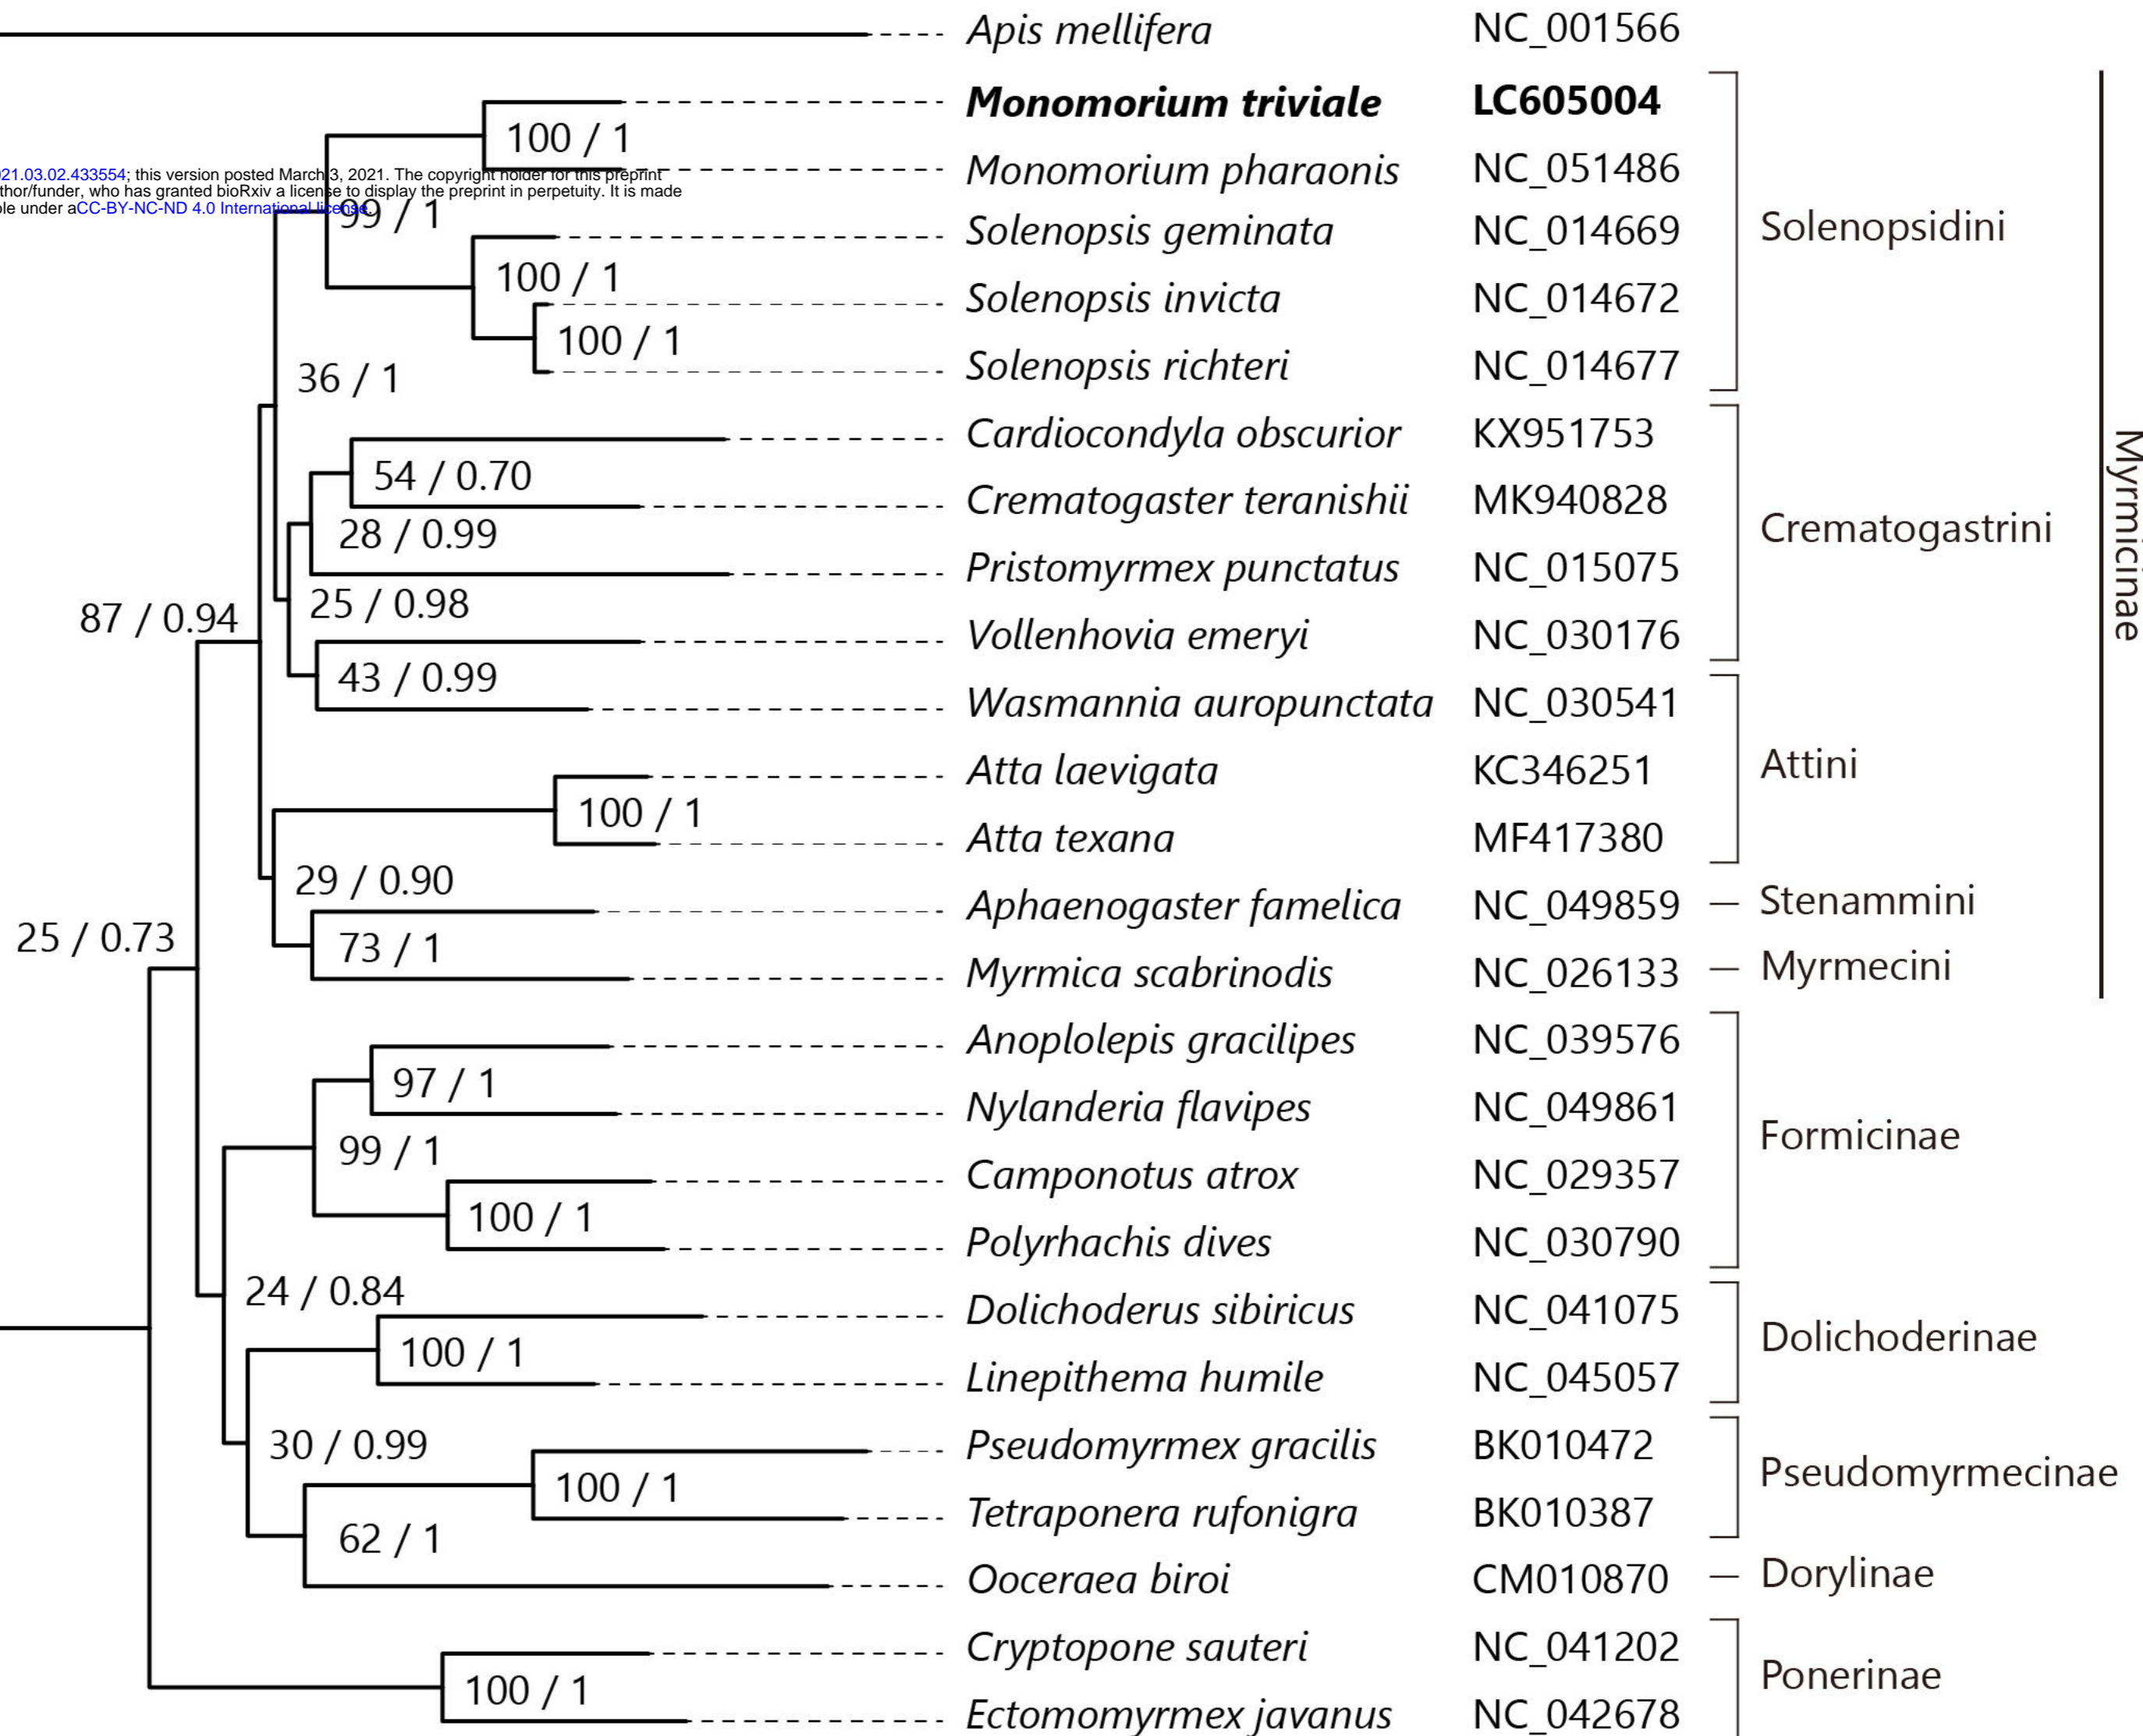

Source: https://www.biorxiv.org/content/10.1101/2021.03.02.433554v1.full.pdf
